# Supplementary material for: NIX initiates mitochondrial fragmentation via DRP1 to drive epidermal differentiation
Source: PubMed Central journal article supplement — Cell Rep. Author manuscript; Available in PMC 2021 Feb 17. (PMC7888979; doi:10.1016/j.celrep.2021.108689), 2021-02-02
Supplement: NIHMS1669639-supplement-1.pdf [file NIHMS1669639-supplement-1.pdf]

**Cell Reports, Volume 34**

**Supplemental Information**

**NIX initiates mitochondrial fragmentation  
via DRP1 to drive epidermal differentiation**

**Cory L. Simpson, Mariko K. Tokito, Ranjitha Uppala, Mrinal K. Sarkar, Johann E. Gudjonsson, and Erika L.F. Holzbaur**

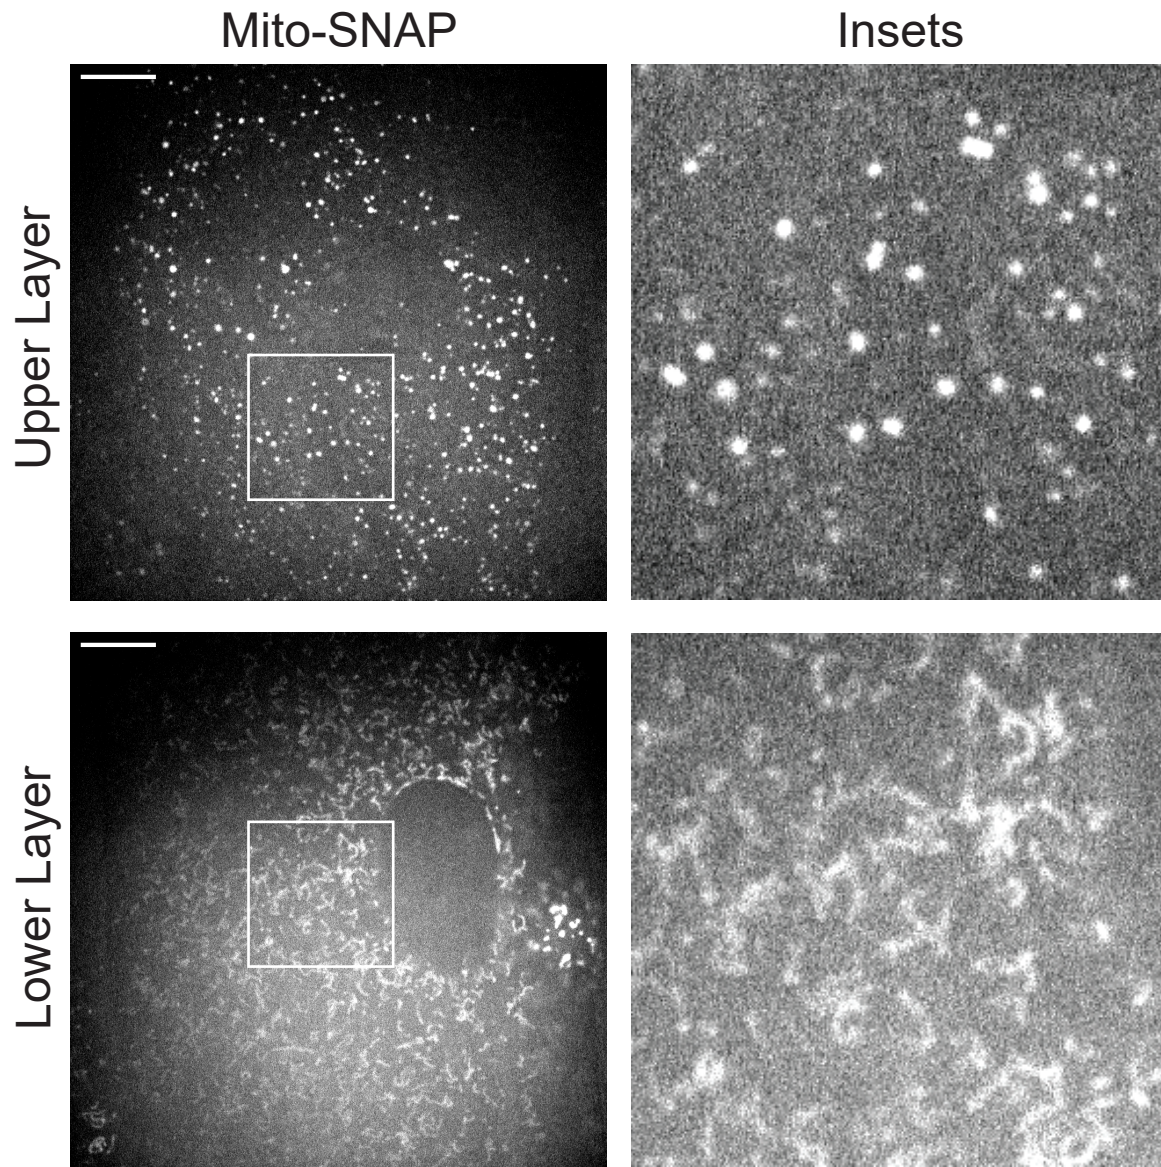

**Figure S1: Keratinocyte mitochondria undergo fragmentation in the upper layers of organotypic epidermis, Related to Figure 1.** SDC images of organotypic epidermis transduced with Mito-SNAP and treated with 647 nm-labeled cell-permeable SNAP tag. While branched and tubular mitochondria were present in lower layers (lower panels), differentiating cells within the upper layers (upper panels) exhibited spherical mitochondrial fragments. White bar=10  $\mu$ m.

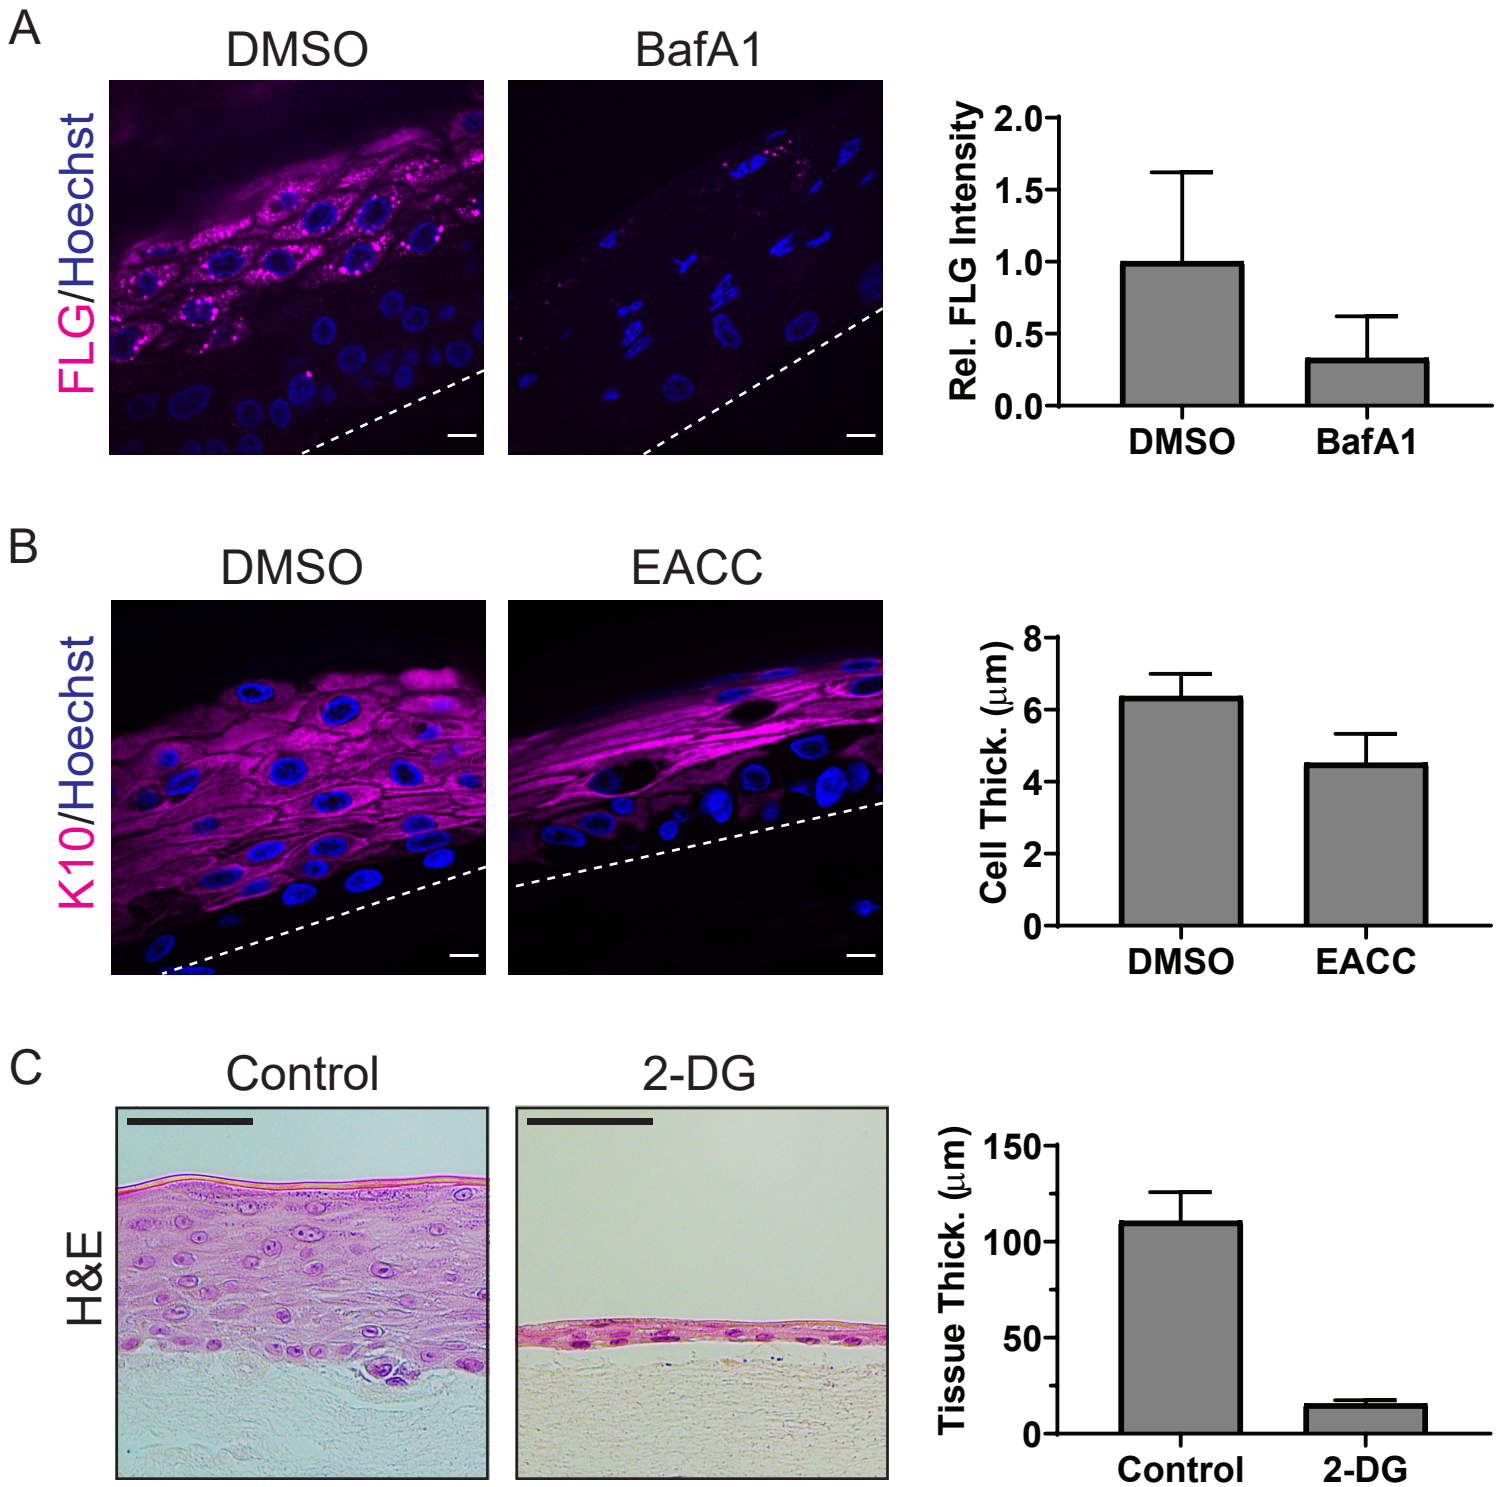

**Figure S2: Lysosomal acidification, autophagosome-lysosome fusion, and glycolysis are critical for epidermal differentiation, Related to Figure 2.** (A) ImF of FLG in DMSO- vs. BafA1-treated organotypic epidermis; (right) quantification of relative intensity of FLG ImF (mean $\pm$ SD; n=8 fields). (B) K10 ImF in DMSO- vs. EACC-treated organotypic epidermis highlights morphology of suprabasal keratinocyte layers; (right) quantification of thickness of K10-positive cells (mean $\pm$ SD; n=20 fields). (C) H&E staining of control vs. 2-DG-treated organotypic epidermis; (right) quantification of tissue thickness (mean $\pm$ SD; n=8 fields). Dashed line marks bottom of epidermis; white bar=10  $\mu$ m; black bar=50  $\mu$ m.



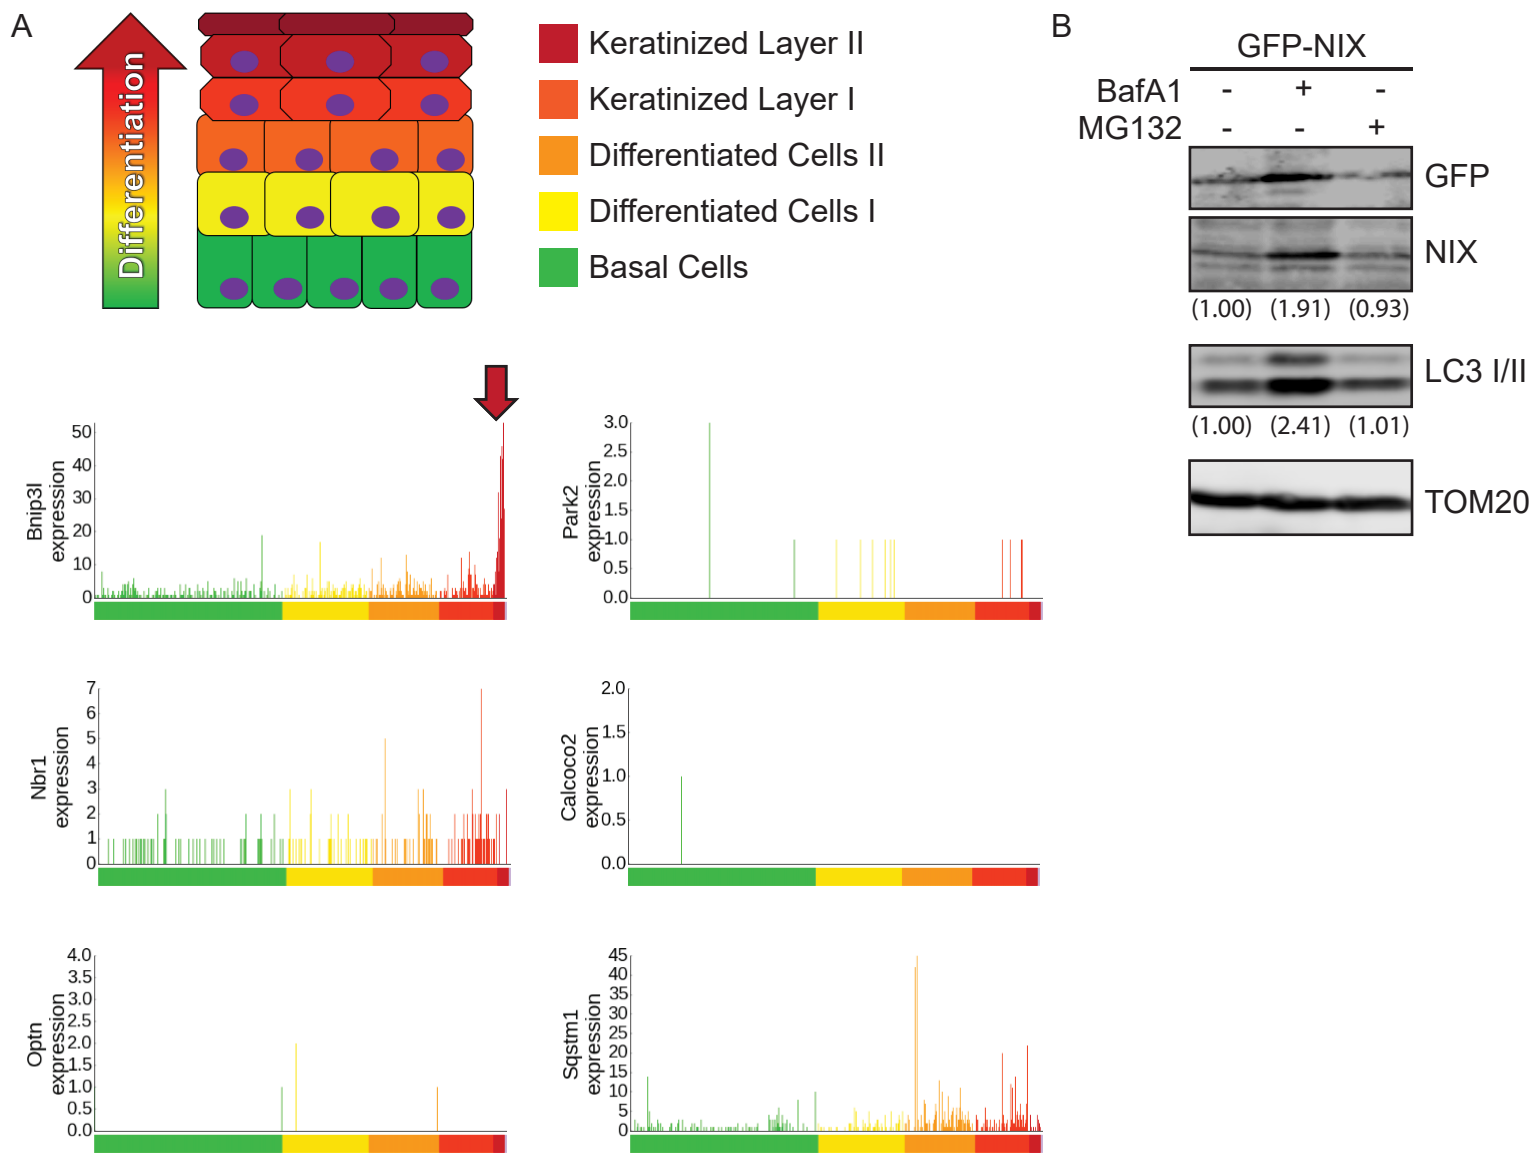

**Figure S3: NIX expression is up-regulated in the upper epidermal layers and its protein levels are controlled by lysosomal degradation, Related to Figure 3.** (A) Diagram of the epidermis depicting keratinocytes that progressively differentiate as they move upward in the epithelium with layers coded by color; (below) graphs generated from the public single-cell RNA sequencing database from murine epidermal keratinocytes (<http://linnarssonlab.org/epidermis/>) (Joost et al. 2016) depicting color-coded RNA expression levels in the different epidermal layers for the following genes: NIX (Bnip3l), Parkin (Park2), Nbr1, NDP52 (Calcoco2), optineurin (Optn), and p62 (Sqstm1); red arrow denotes a marked increase in NIX expression in the uppermost keratinocyte layers. (B) WB of lysates from NHEKs transduced with GFP-NIX and treated with DMSO vs. BafA1 to inhibit lysosomal degradation or MG132 to inhibit proteasomal degradation (below, relative band intensity normalized to TOM20).



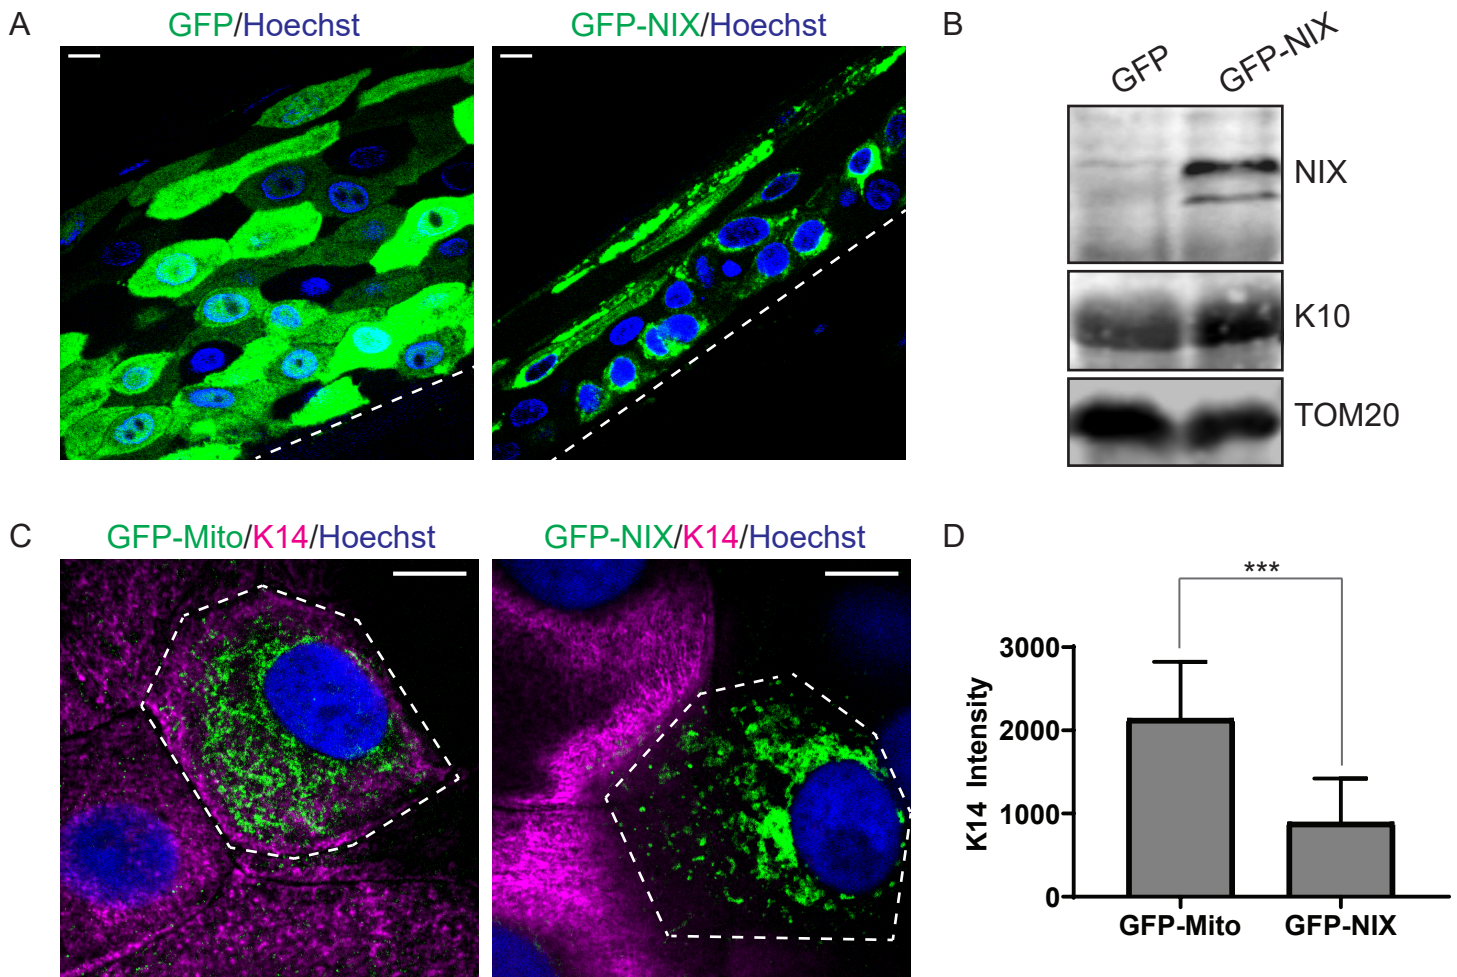

**Figure S4: Premature NIX expression accelerates the epidermal differentiation program, Related to Figure 5.**

(A) NHEKs transduced with GFP or GFP-NIX were grown as organotypic cultures for 5 days, then were fixed and tissue sections were immunostained with anti-GFP to localize expression of the transgene and Hoechst. Dashed line marks bottom of epidermis; bar=10  $\mu$ m. (B) WB of day 5 organotypic culture lysates, which demonstrated transgenic NIX expression in cultures transduced with GFP-NIX while keratin 10 (K10) was expressed in both GFP- and GFP-NIX-transduced cultures; TOM20 serves as a protein loading control for mitochondria. (C) NHEKs transduced with GFP-Mito or GFP-NIX were fixed in methanol and immunostained for K14 and Hoechst. Dashed line marks cell outline; bar=10  $\mu$ m. (D) The average intensity of K14 immunostaining was quantified in cells expressing GFP-Mito compared to GFP-NIX (mean $\pm$ -SD; n=101 cells from 4 donors, \*\*\*p<0.0001).
